# Supplementary material for: A Personalized Glomerulus Chip Engineered from Stem Cell-Derived Epithelium and Vascular Endothelium
Source: MDPI journal article supplement (doi:10.3390/mi12080967), 2021-08-16
Supplement: s1 [file s1]

Supplementary:

## A Personalized Glomerulus Chip Engineered from Stem Cell-Derived Epithelium and Vascular Endothelium

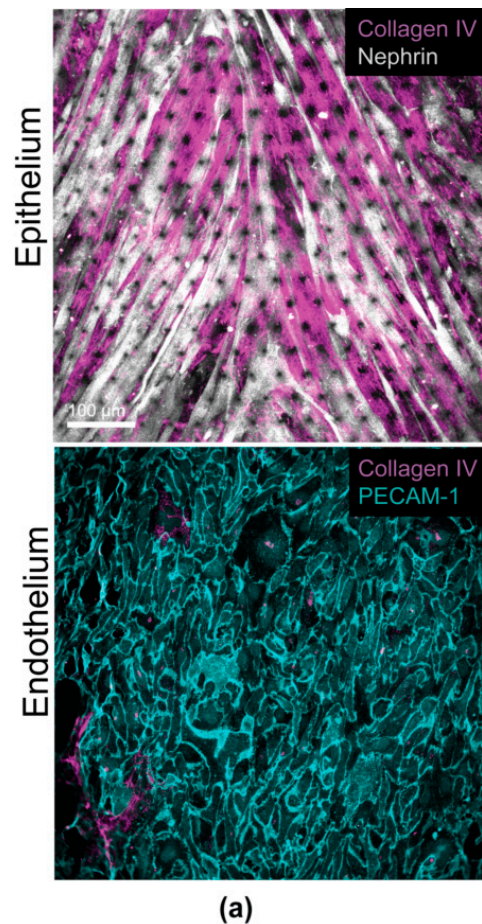

**Figure S1.** Human iPS cell-derived epithelium and endothelium secrete the most abundant glomerular basement membrane protein, collagen type IV. (a) Representative confocal microscopy images of the collagen type IV-positive (magenta), Nephrin-positive (white) epithelium (top), collagen type IV-positive (magenta), and PECAM-1-positive endothelium (bottom). Scale bar 100 μm.

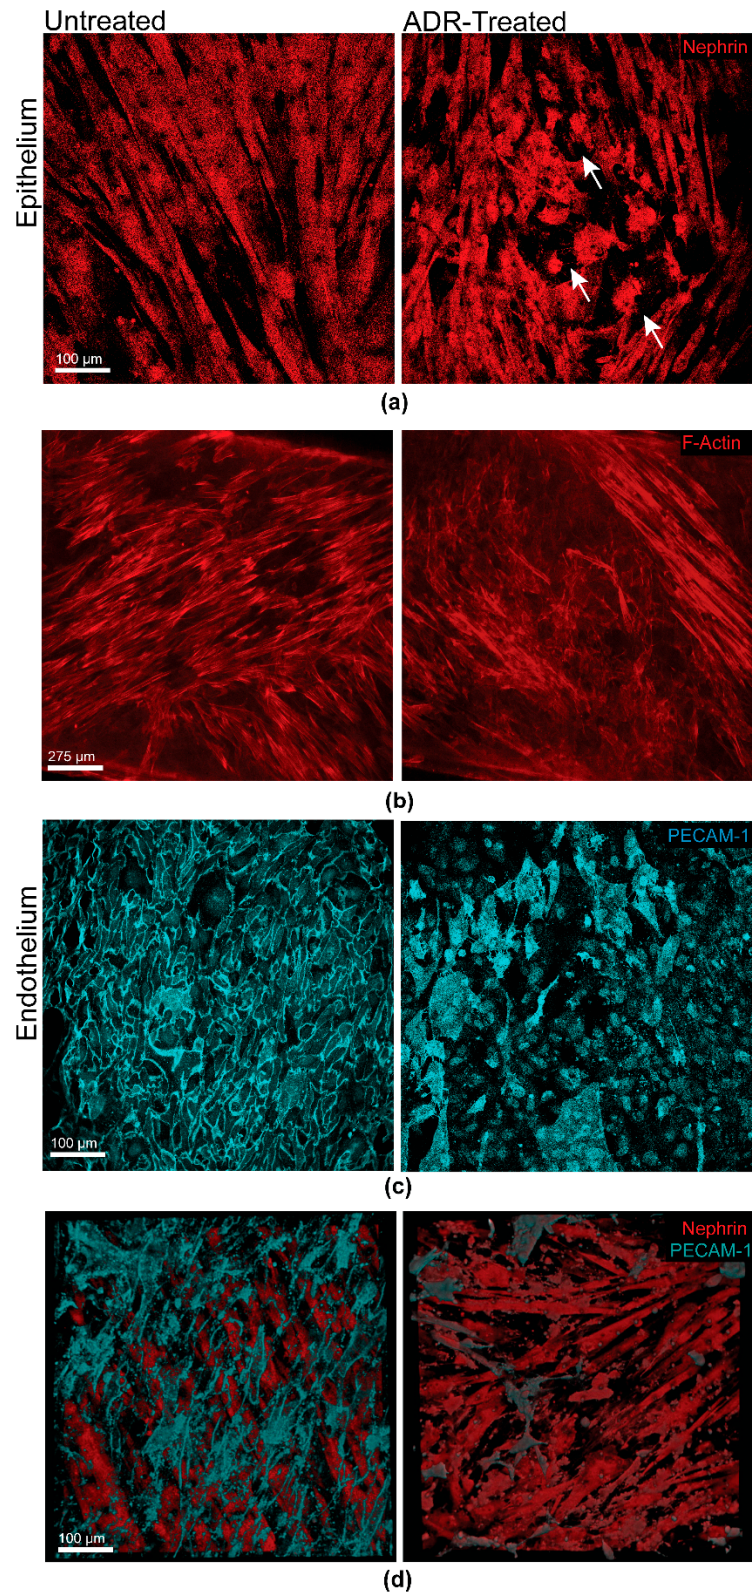

**Figure S2.** Human iPS cell-derived epithelium (podocyte layer) and endothelium recapitulate Adriamycin-induced tissue damage. (a) Representative confocal microscopy images of the untreated and treated Nephrin positive (red) podocytes in the urinary channel. Arrows indicate specific podocytes' cell body retraction. Scale bar 100  $\mu\text{m}$ ; (b) Representative immunofluorescent images of the untreated and treated F-actin positive (red) podocytes in the urinary channel. Scale bar 275  $\mu\text{m}$  (c) Representative confocal microscopy images of the untreated and treated PECAM-1 positive (cyan) endothelium in the capillary channel. Scale bar 100  $\mu\text{m}$  (d) Three-dimensional overlay of Nephrin positive epithelium and PECAM-1 positive endothelium. Images represent basal to apical view. Scale bar 100  $\mu\text{m}$ .
